# Supplementary material for: Caenorhabditis elegans Dicer acts with the RIG-I-like helicase DRH-1 and RDE-4 to cleave dsRNA
Source: eLife journal article supplement (doi:10.7554/elife.93979), 2024-01-17
Supplement: fig1-data3 [file elife-93979-fig1-data3-v1.zip]

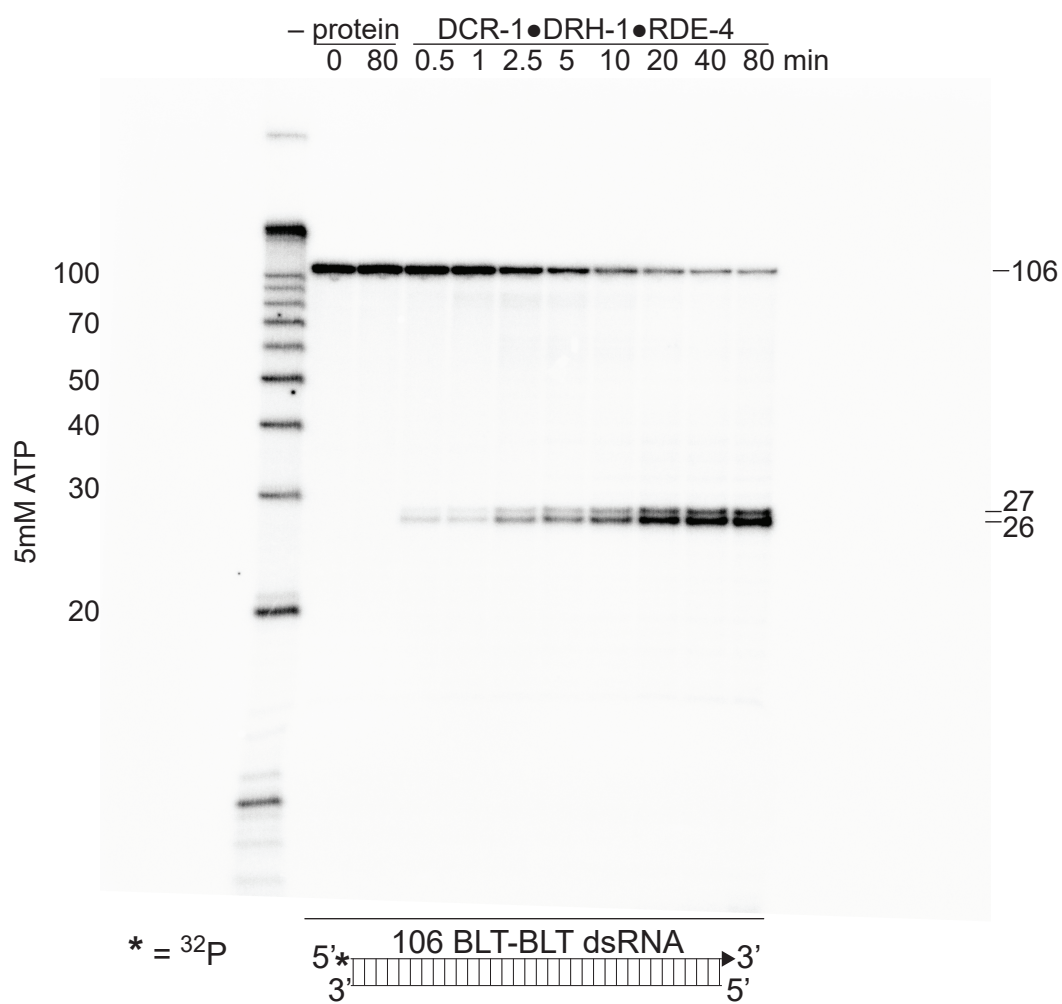

Figure 1 - source data 3: Raw digital image of cleavage phosphorimager plate used in Figure 1D, left panel.
