# Supplementary material for: Caenorhabditis elegans Dicer acts with the RIG-I-like helicase DRH-1 and RDE-4 to cleave dsRNA
Source: eLife journal article supplement (doi:10.7554/elife.93979), 2024-01-17
Supplement: fig2-figsupp1-data7 [file elife-93979-fig2-figsupp1-data7-v1.zip]

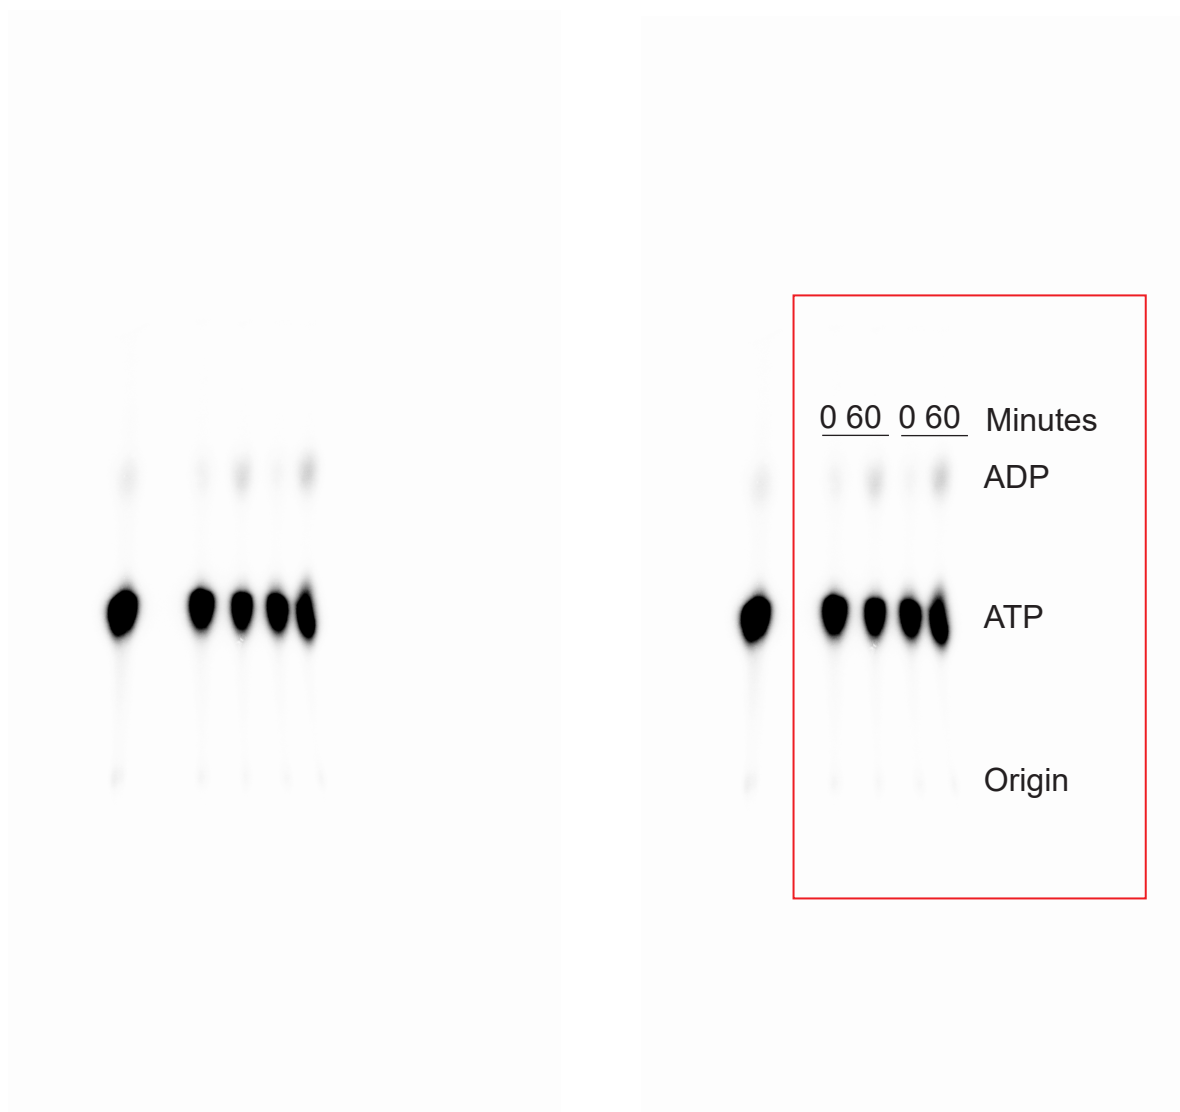

Figure 2 - figure supplement 1 - source data 7: Duplicate raw digital images of thin-layer chromatography plates. Image on the right shows region of the plate used in Figure 2 - figure supplement 1D.
