# Supplementary figures and images for: Caenorhabditis elegans Dicer acts with the RIG-I-like helicase DRH-1 and RDE-4 to cleave dsRNA
Source: eLife journal article supplement (doi:10.7554/elife.93979), 2024-01-17

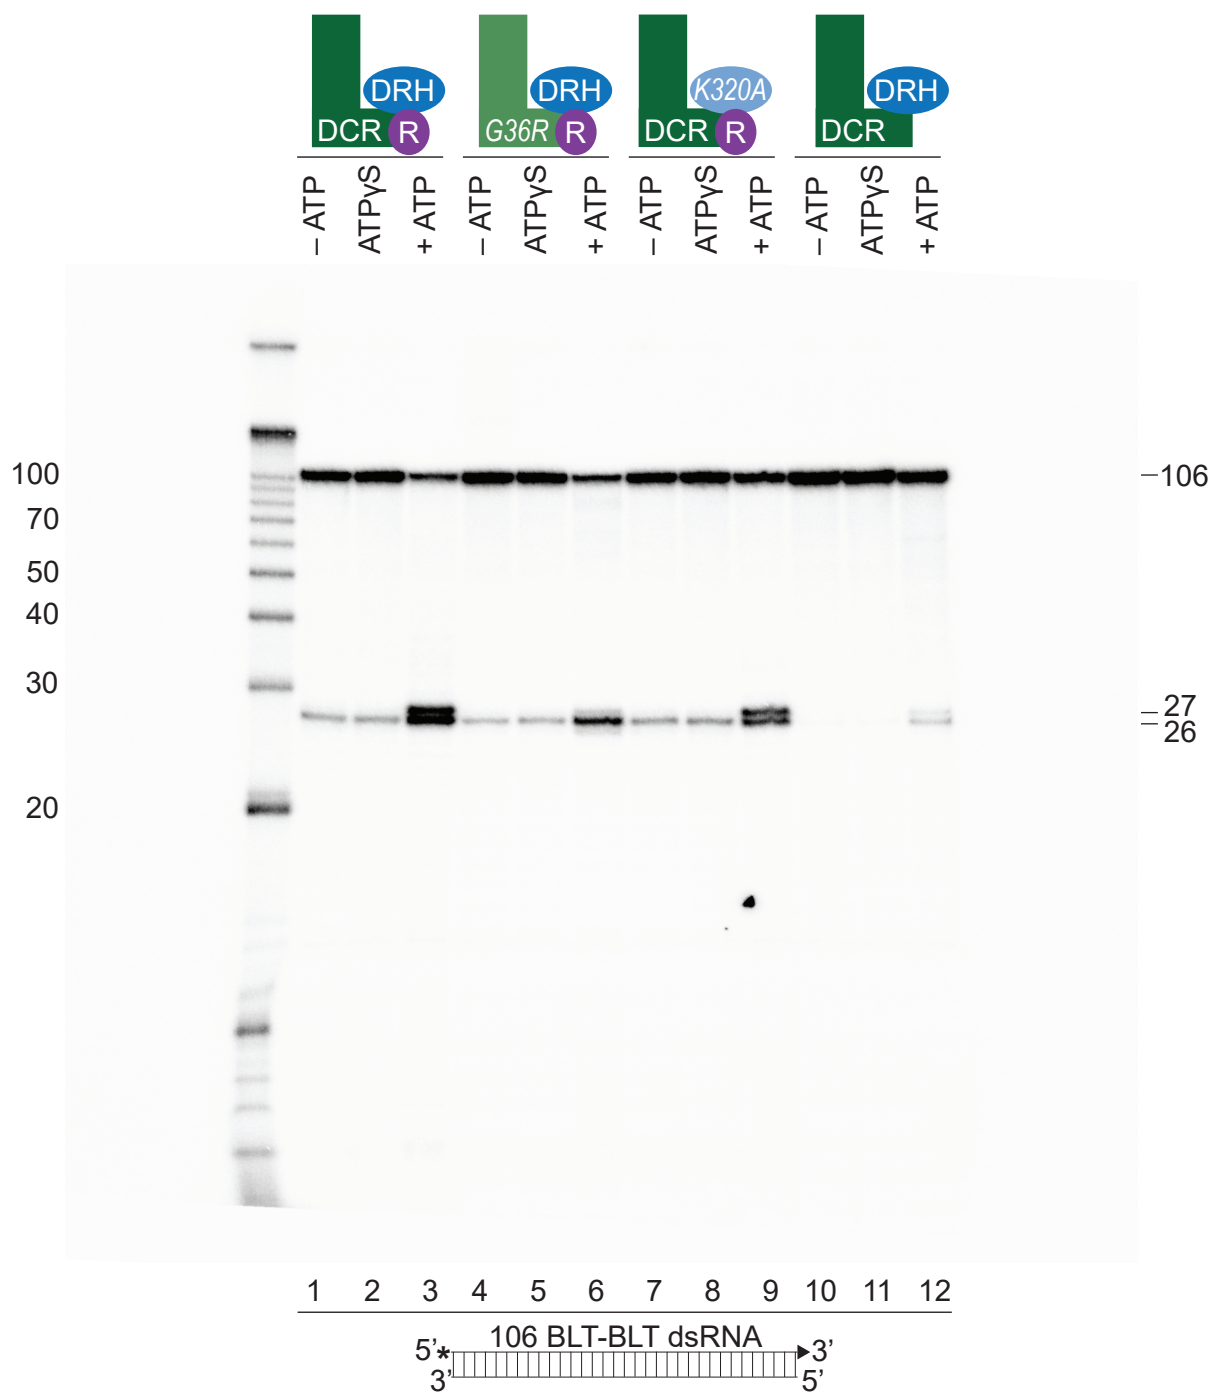

Figure 2 - source data 1: Raw digital image of cleavage phosphorimager plate used in Figure 2A.

Supplement: fig2-data1 [file elife-93979-fig2-data1-v1.zip]

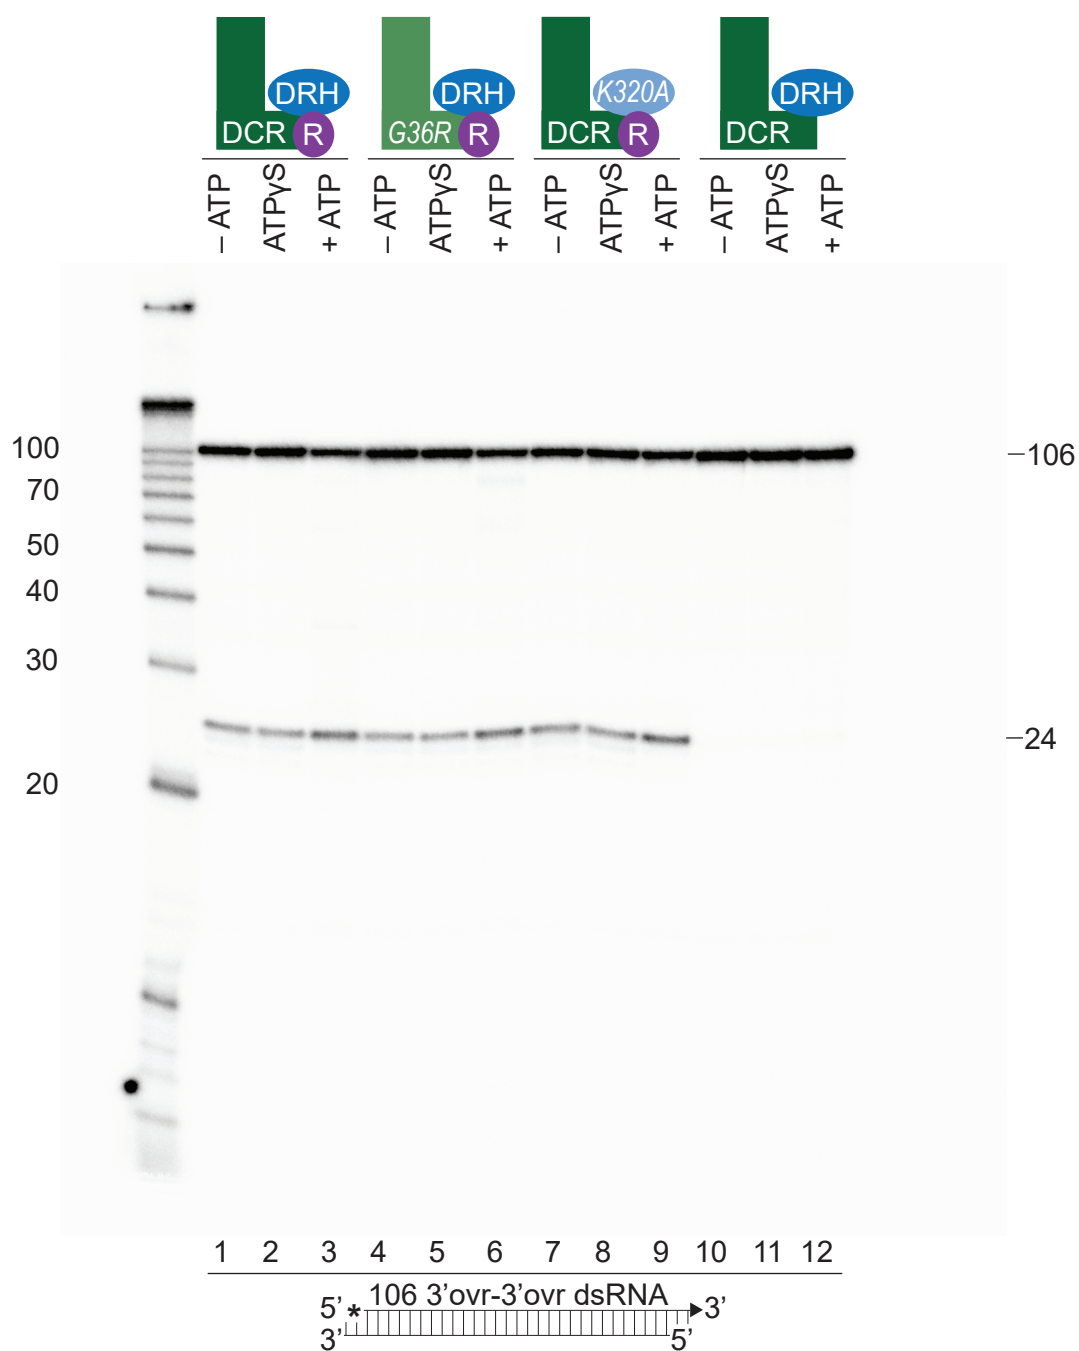

Figure 2 - source data 2: Raw digital image of cleavage phosphorimager plate used in Figure 2B.

Supplement: fig2-data2 [file elife-93979-fig2-data2-v1.zip]

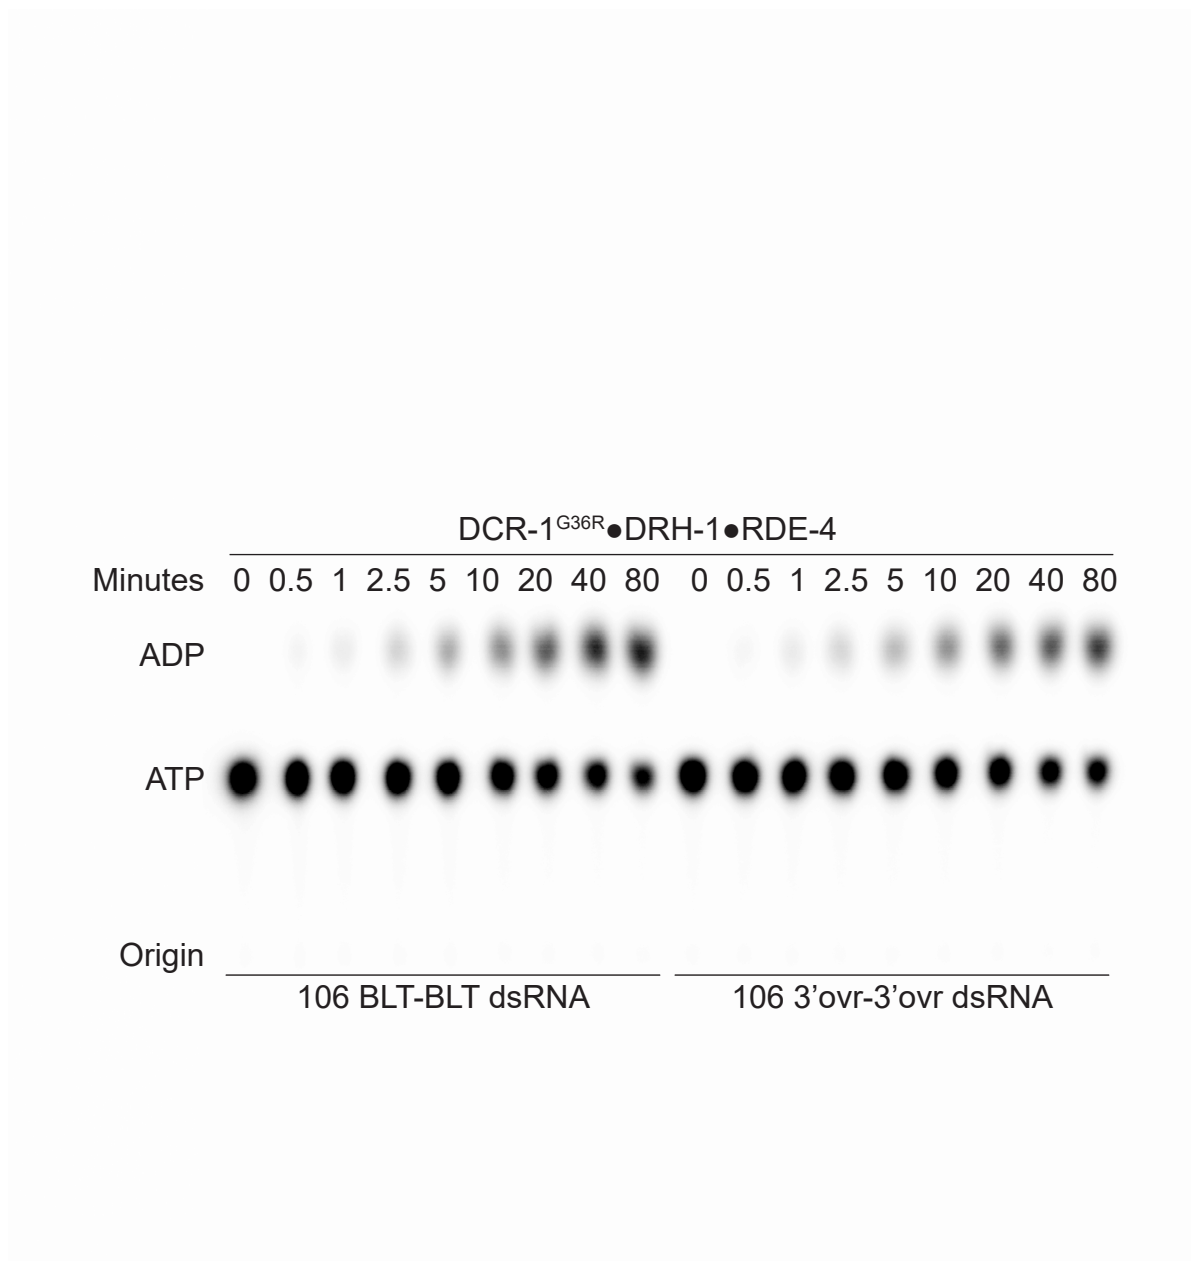

Figure 2 - source data 5: Raw digital image of thin-layer chromatography plate used in Figure 2E.

Supplement: fig2-data5 [file elife-93979-fig2-data5-v1.zip]

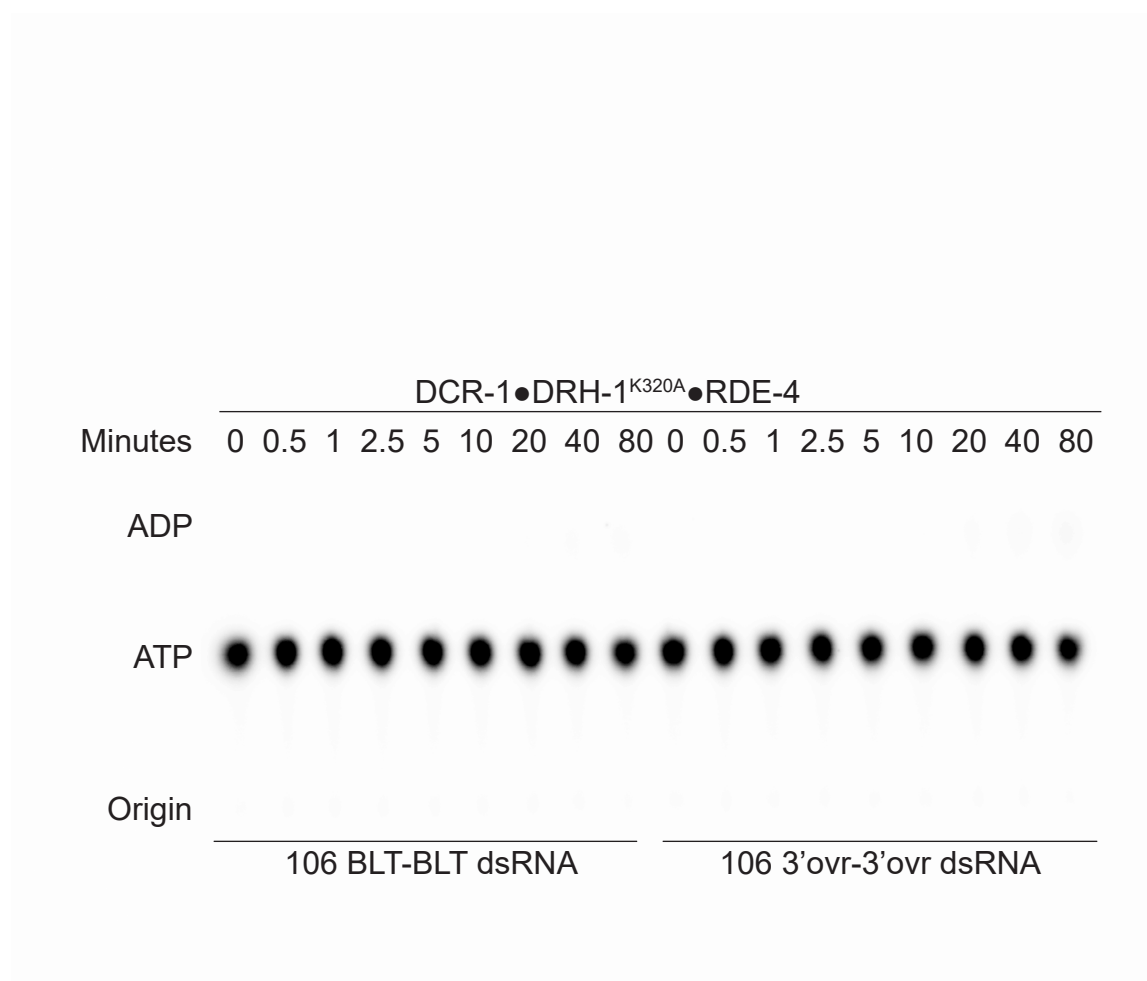

Figure 2 - source data 6: Raw digital image of thin-layer chromatography plate used in Figure 2F.

Supplement: fig2-data6 [file elife-93979-fig2-data6-v1.zip]

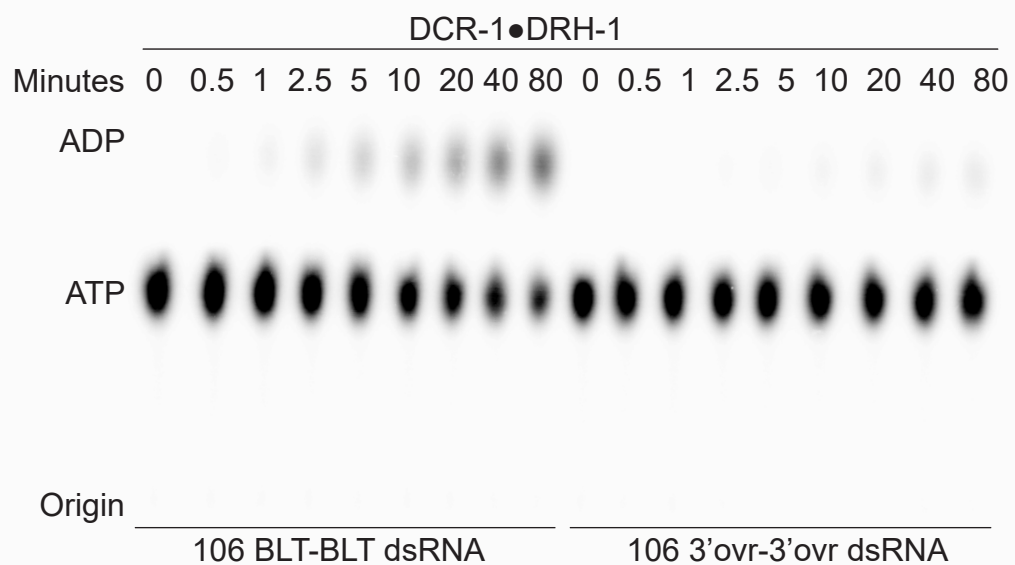

Figure 2 - source data 7: Raw digital image of thin-layer chromatography plate used in Figure 2G.

Supplement: fig2-data7 [file elife-93979-fig2-data7-v1.zip]

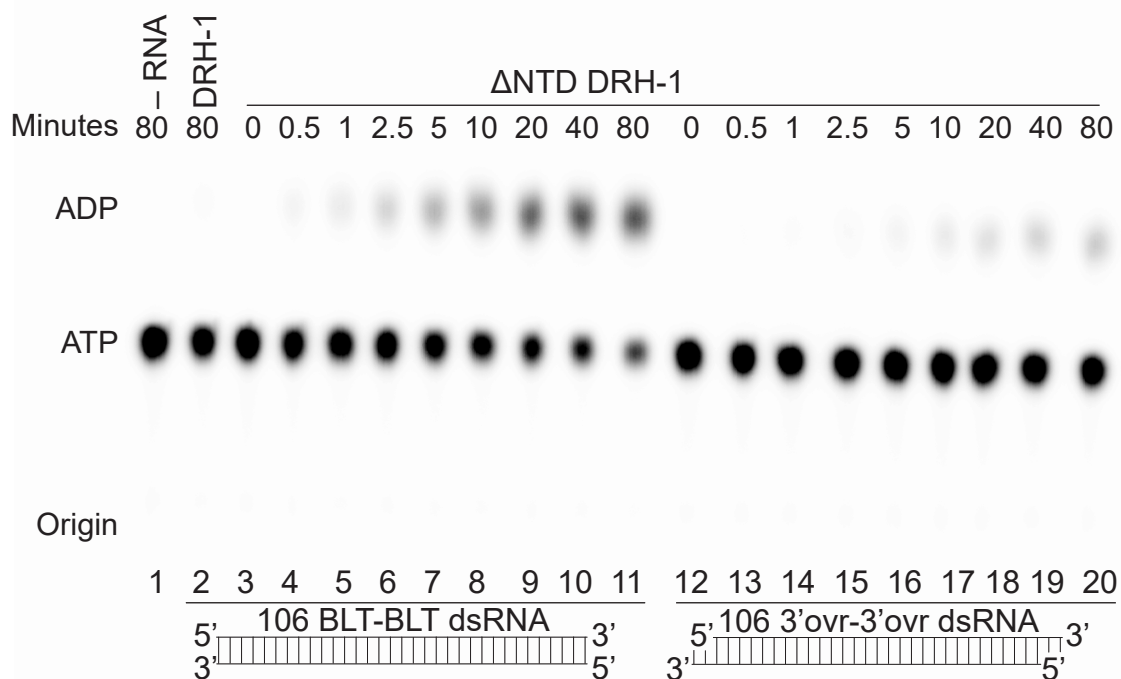

Figure 5 - source data 1: Raw digital image of thin-layer chromatography plate used in Figure 5A.

Supplement: fig5-data1 [file elife-93979-fig5-data1-v1.zip]

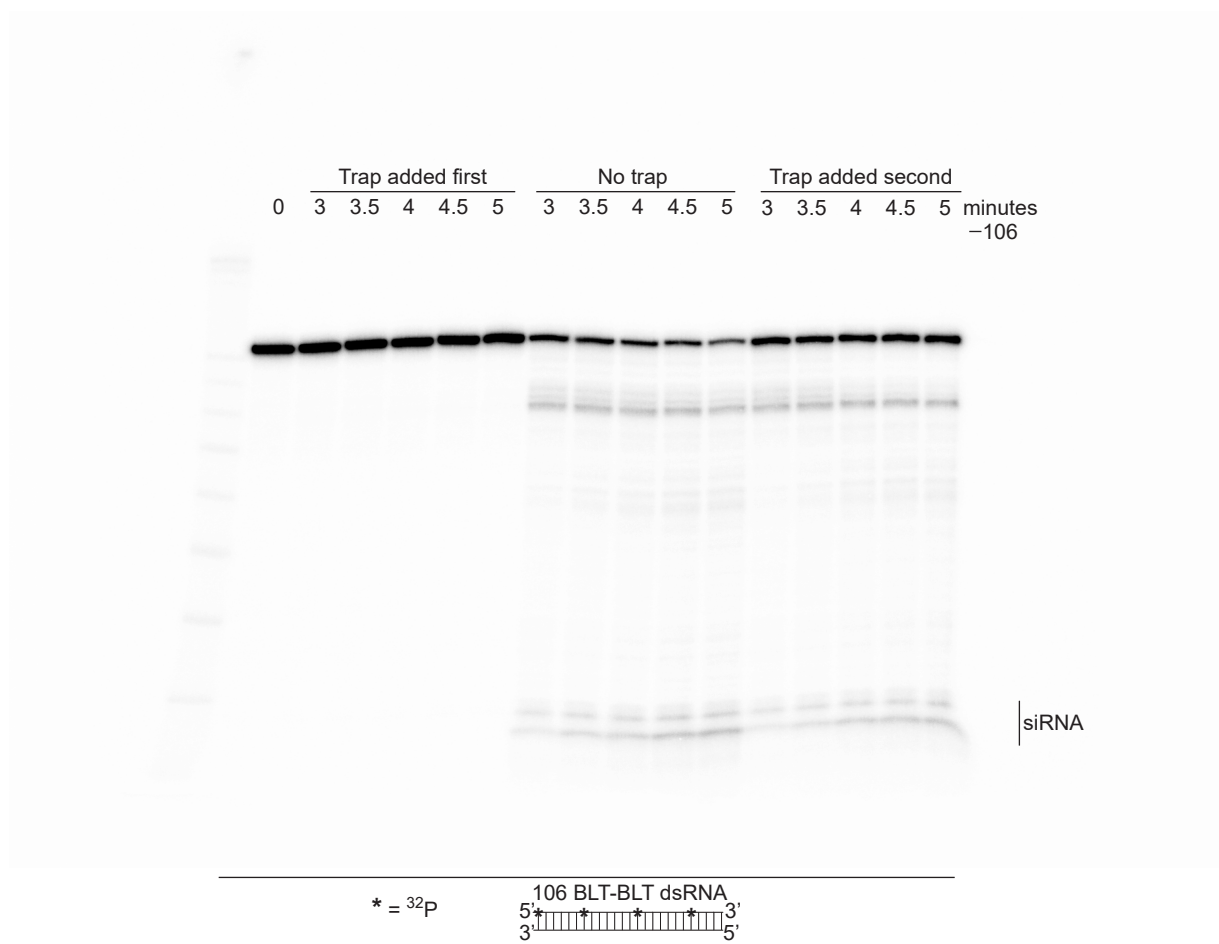

Figure 5 - source data 2: Raw digital image of cleavage phosphorimager plate used in Figure 5C.

Supplement: fig5-data2 [file elife-93979-fig5-data2-v1.zip]

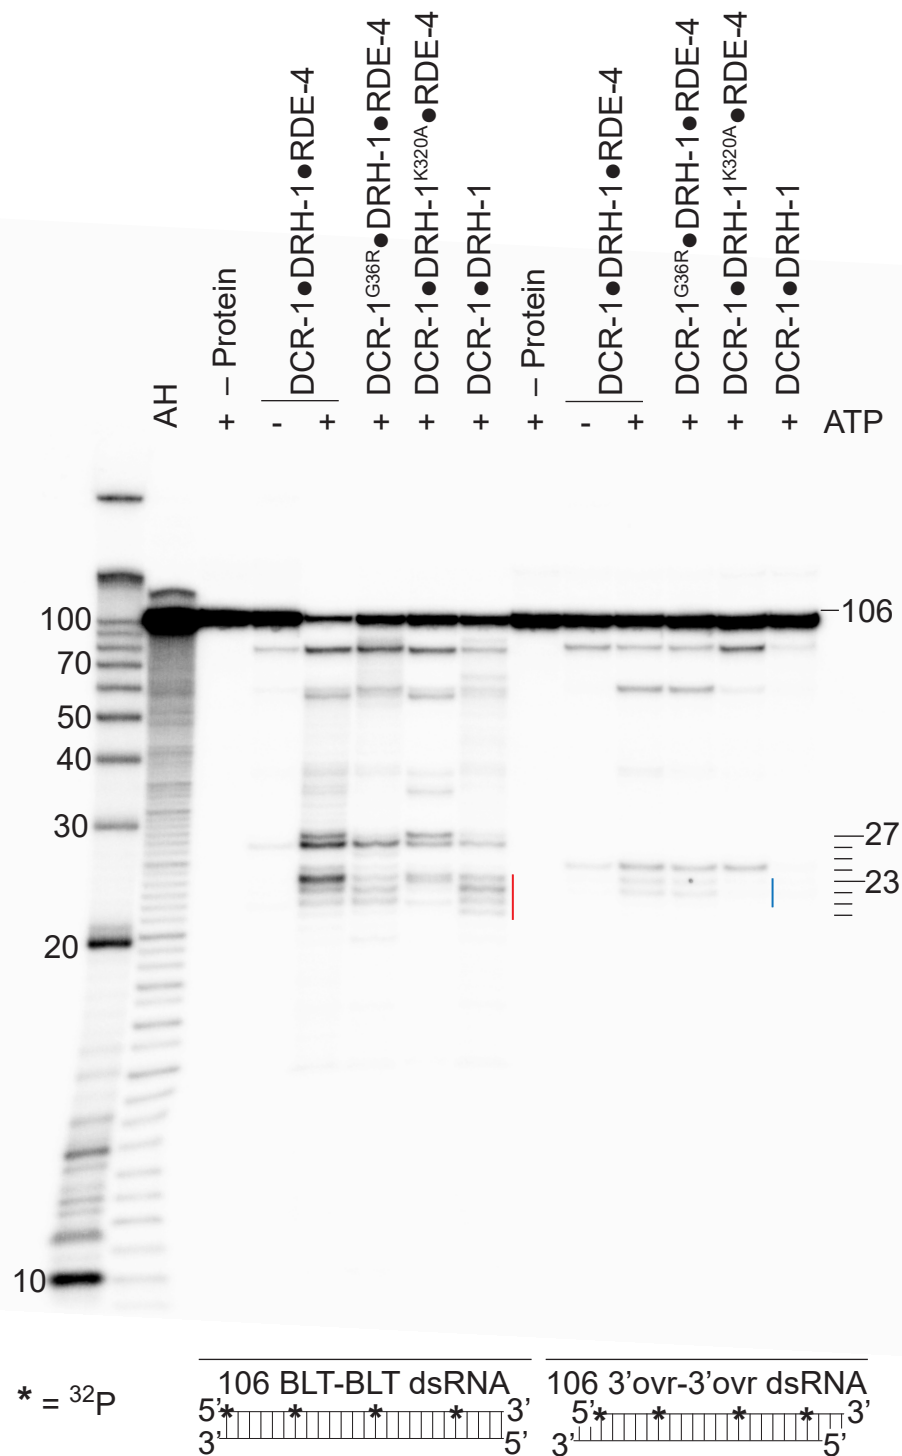

Figure 5 - source data 3: Raw digital image of cleavage phosphorimager plate used in Figure 5E.

Supplement: fig5-data3 [file elife-93979-fig5-data3-v1.zip]
